# Supplementary material for: Correlates of Physical Activity of Children and Adolescents with Autism Spectrum Disorder in Low- and Middle-Income Countries: A Systematic Review of Cross-Sectional Studies
Source: MDPI journal article supplement (doi:10.3390/ijerph192316301), 2022-12-05
Supplement: s1 [file s1]

**Table S1.** Criteria for evaluating internal validity of reported studies using quantitative methodologies [48,49].

| Questions        |                                                                               | Evaluation |                             |
|------------------|-------------------------------------------------------------------------------|------------|-----------------------------|
| <b>Purpose</b>   | Q1: Was the study purpose stated clearly?                                     | 1=Yes      | 0=No                        |
| Study background | Q2: Was the relevant background literature reviewed?                          | 1=Yes      | 0=No                        |
| Study design     | Q3: Was the design appropriate for the research question?                     | 1=Yes      | 0=No                        |
| Sampling         | Q4: Was the sample described in detail?                                       | 1=Yes      | 0=No                        |
|                  | Q5: Was the sample size justified?                                            | 1=Yes      | 0=No                        |
|                  |                                                                               |            | 0=No                        |
|                  | Q6: Was informed consent obtained? (if not described, assume No)              | 1=Yes      | If not applicable, assume 3 |
| Measurement      | Q7: Were the outcome measures reliable? (if not described, assume No)         | 1=Yes      | 0=No                        |
|                  | Q8: Were the outcome measures valid? (if not described, assume No)            | 1=Yes      | 0=No                        |
|                  | Q9: Was the method described in detail                                        | 1=Yes      | 0=No                        |
| Data analysis    | Q10: Were results reported in terms of statistical significance?              | 1=Yes      | 0=No                        |
|                  | Q11: Were the analysis methods appropriate?                                   | 1=Yes      | 0=No                        |
|                  | Q12: Was importance for the practice reported?                                | 1=Yes      | 0=No                        |
|                  |                                                                               |            | 0=No                        |
|                  | Q13: Were any drop-outs reported?                                             | 1=Yes      | If not applicable, assume 3 |
| Conclusions      | Q14: Were the conclusions appropriate given the study methods?                | 1=Yes      | 0=No                        |
| Implications     | Q15: Are there any implications for practice given the results of the study?  | 1=Yes      | 0=No                        |
| Limitations      | Q16: Were limitations of the study acknowledged and described by the authors? | 1=Yes      | 0=No                        |

**Table S2.** Results of study quality evaluation using the McMaster Critical Review Form for Quantitative Studies.

| Study                        | Items   |                  |              |          |             |               |             |              |             | Score |      |
|------------------------------|---------|------------------|--------------|----------|-------------|---------------|-------------|--------------|-------------|-------|------|
|                              | Purpose | Study Background | Study Design | Sampling | Measurement | Data Analysis | Conclusions | Implications | Limitations | Raw   | %    |
| Pan & Frey (2005) [56]       | Y       | Y                | Y            | 3Y       | 3Y          | 4Y            | Y           | Y            | Y           | 16    | 100  |
| Pan & Frey (2006) [57]       | Y       | Y                | Y            | 3Y       | 3Y          | 4Y            | Y           | Y            | Y           | 16    | 100  |
| Pan (2008 a) [31]            | Y       | Y                | Y            | 2Y       | 3Y          | 3Y            | Y           | Y            | Y           | 15    | 93.8 |
| Pan (2008 b) [41]            | Y       | Y                | Y            | 2Y       | 3Y          | 4Y            | Y           | Y            | Y           | 15    | 93.8 |
| Pan (2009) [58]              | Y       | Y                | Y            | 2Y       | 2Y          | 4Y            | Y           | Y            | Y           | 14    | 87.5 |
| Pan et al. (2011a) [42]      | Y       | Y                | Y            | 2Y       | 2Y          | 4Y            | Y           | Y            | Y           | 14    | 87.5 |
| Pan et al. (2011b) [59]      | Y       | Y                | Y            | Y        | Y           | 4Y            | Y           | Y            | N           | 11    | 68.8 |
| Pan et al. (2011c) [60]      | Y       | Y                | Y            | 2Y       | 3Y          | 4Y            | Y           | Y            | Y           | 15    | 93.8 |
| Memari et al. (2013) [61]    | Y       | Y                | Y            | 2Y       | 3Y          | 4Y            | Y           | Y            | Y           | 15    | 93.8 |
| Memari et al. (2015) [62]    | Y       | Y                | Y            | Y        | 2Y          | 4Y            | Y           | N            | Y           | 12    | 75   |
| Pan et al. (2015) [43]       | Y       | Y                | Y            | 2Y       | 2Y          | 4Y            | Y           | N            | Y           | 13    | 81.3 |
| Bicer & Alsaffar (2016) [63] | Y       | Y                | Y            | Y        | Y           | 4Y            | Y           | Y            | Y           | 12    | 75   |
| Pan et al. (2016) [40]       | Y       | Y                | Y            | 2Y       | 2Y          | 4Y            | Y           | Y            | Y           | 15    | 93.8 |
| Memari et al. (2017) [23]    | Y       | Y                | Y            | 2Y       | 3Y          | 4Y            | Y           | Y            | Y           | 15    | 93.8 |
| Pan et al. (2021) [24]       | Y       | Y                | Y            | 2Y       | 3Y          | 4Y            | Y           | Y            | Y           | 15    | 93.8 |
